# Supplementary material for: Strain-dependent anisotropic nonlinear optical response in two-dimensional functionalized MXene Sc2CT2 (T = O and OH)
Source: Royal Society of Chemistry journal article supplement (doi:10.1039/d0cp03968c), 2020-01-01
Supplement: d0cp03968c1.pdf [file d0cp03968c1.pdf]

## Supporting Information

### **Strain-dependent Anisotropic Nonlinear Optical Response in Two-Dimensional Functionalized MXene $\text{Sc}_2\text{CT}_2$ (T=O and OH)**

Chuan He<sup>a</sup>, Qiyi Zhao<sup>b, \*</sup>, Yuanyuan Huang<sup>a</sup>, Wanyi Du<sup>a</sup>, Lipeng Zhu<sup>c</sup>, Yixuan Zhou<sup>a</sup>, Sujuan Zhang<sup>a</sup>, Xinlong Xu<sup>a, \*</sup>

a. Shaanxi Joint Lab of Graphene, International Collaborative Center on Photoelectric Technology and Nano Functional Materials, Institute of Photonics & Photon-Technology, Northwest University, Xi'an 710069, China.

b. School of Science, Xi'an University of Posts & Telecommunications, Xi'an 710121, China.

c. School of Electronic Engineering, Xi'an University of Posts & Telecommunications, Xi'an 710121, China.

*Corresponding author E-mail:* [xlxuphy@nwu.edu.cn](mailto:xlxuphy@nwu.edu.cn) (Xinlong Xu), Fax: +86-29-88303667.  
[qiyi\\_xiyouphy@163.com](mailto:qiyi_xiyouphy@163.com) (Qiyi Zhao).

## 1. Electronic properties of $\text{Sc}_2\text{CT}_2$ (T=O and OH) MXenes monolayers

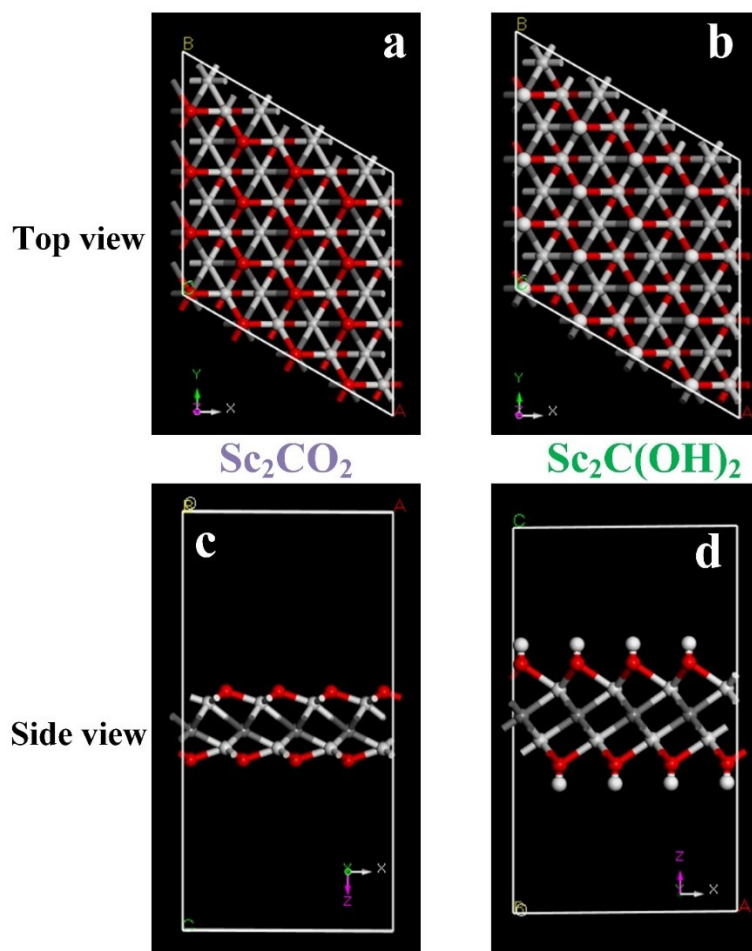

Figure S1 (a) Top view and (c) side view of the most stable configuration of monolayer  $\text{Sc}_2\text{CO}_2$ ; (b) and (d) of monolayer  $\text{Sc}_2\text{C(OH)}_2$ .

The geometry optimization and optical properties of materials are performed using the plane-wave basis Vienna ab initio simulation package (VASP) based on universal density functional theory (DFT) calculations under the generalized gradient approximation (GGA) with the Perdew–Burke–Ernzerhof (PBE) functional[1-3]. The optimized lattice parameters of 2D  $\text{Sc}_2\text{CO}_2$  and  $\text{Sc}_2\text{C(OH)}_2$  are 3.404 Å and 3.264 Å, respectively. The cutoff kinetic energies for plane waves are set as 400 eV. The relaxation of energy is taken as  $1.0 \times 10^{-5}$  eV. For the calculations of the strained monolayer  $\text{Sc}_2\text{CT}_2$  (T=O and OH) structures, to avoid interactions between adjacent layers, a vacuum layer with a thickness of 15 Å is utilized.

To determine the optoelectronic properties of 2D monolayer  $\text{Sc}_2\text{CT}_2$  (T=O and OH) as a function of strain, the biaxial tensile strain from 1% to 5% has been applied to 2D  $\text{Sc}_2\text{CT}_2$  monolayers. The electronic properties of the strained  $\text{Sc}_2\text{CT}_2$  monolayers are shown in Figure S2. The band structure of  $\text{Sc}_2\text{CO}_2$  monolayer with 0%~2% strain shows indirect band-gap from valence band maximum (VBM) at the  $\Gamma$  point to conduction band minimum (CBM) at the K point as shown in Figure S2(a-c). For 3%~5% strained

Sc<sub>2</sub>CO<sub>2</sub> monolayer, however, the band structure shows direct band gap from VBM at the K point to CBM at the K point as shown in Figure S2(d-f). The band structure of strained Sc<sub>2</sub>CO<sub>2</sub> monolayer is consistent with previous results[4]. For Sc<sub>2</sub>C(OH)<sub>2</sub> monolayer, the band structure displays direct band-gap from VBM at the  $\Gamma$  point to CBM at the  $\Gamma$  point at 0%~2% tensile strained state as shown in Figure S2(g-i), while the band structure exhibits indirect band-gap from VBM at the  $\Gamma$  point to CBM at the M point at 3%~5% tensile strained state as shown in Figure S2(j-l).

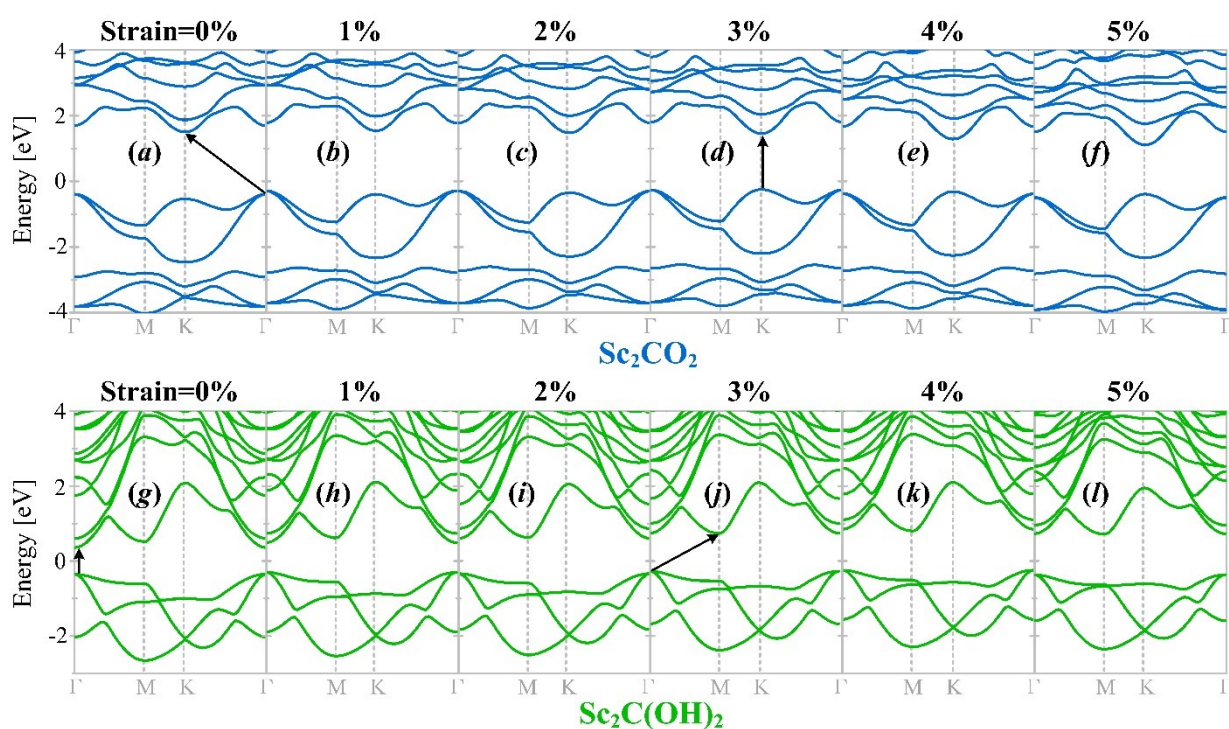

**Figure S2** Band structures of O-terminated MXene [Sc<sub>2</sub>CO<sub>2</sub> (a-f)] and OH-terminated MXene [Sc<sub>2</sub>C(OH)<sub>2</sub> (g-l)] at different tensile strained states.

## 2. Linear optical properties of strained Sc<sub>2</sub>CT<sub>2</sub> (T=O and OH) monolayers

The linear optical response is directly related to the complex dielectric function  $\hat{\epsilon} = \epsilon_{re} + i\epsilon_{im}$ , and the imaginary part of the dielectric function is given by the following equation (S1):

$$\epsilon_{im}^{ab}(\omega) = \frac{4\pi^2}{\Omega} \sum_{nm,k} f_{nm} \frac{r_{nm}^a r_{mn}^b}{\omega_{nm} - \omega} \quad (\text{S1})$$

Where superscripts  $a$  and  $b$  indicate Cartesian components;  $n$  and  $m$  represent the energy bands;  $f_{nm} = f_n - f_m$  is the difference of the Fermi distribution functions;  $\omega_{nm} = \omega_n - \omega_m$  is the frequency difference for bands  $n$  and  $m$ ; and  $\Omega$  is the unit cell volume.  $r_{nm}^a$  is the matrix element of the position operator that is defined as  $r_{nm}^a = -ip_{nm}^a / \omega_{nm}$ . Where  $p_{mn}$  is the momentum matrix element. The real part of the dielectric function is obtained from  $\epsilon_{im}(\omega)$  by Kramer–Kronig transformation. The linear optical properties such as the complex refractive index ( $\hat{n} = n + i\kappa$ ) and the optical absorption ( $\alpha$ ) can be obtained by the calculated dielectric function as follows:

$$\hat{n}^2 = \hat{\epsilon}, \alpha = 4\pi\kappa/\lambda \quad (\text{S2})$$

where  $\lambda$  is the wavelength;  $n$  and  $\kappa$  are real and imaginary parts of the complex refractive index, respectively.

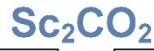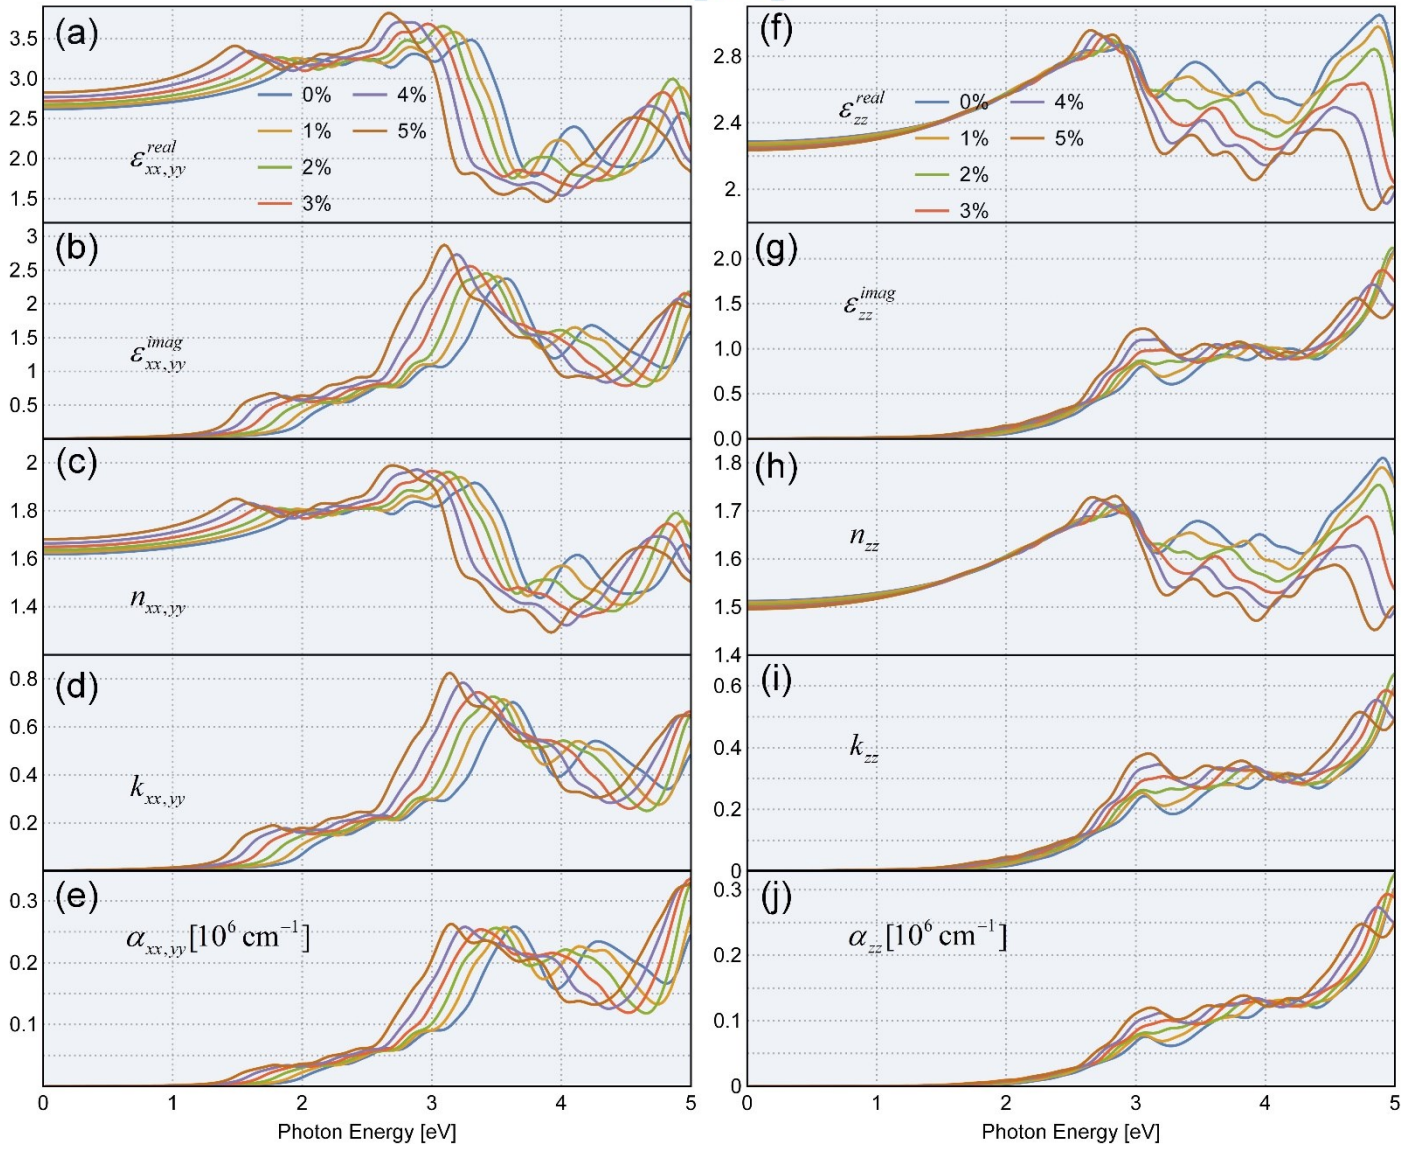

Figure S3. (a)~(f) In-plane and (g)~(l) out-of-plane of the linear optical coefficients including real ( $\epsilon^{real}$ ) and imaginary ( $\epsilon^{imag}$ ) parts of the dielectric function, real ( $n$ ) and imaginary ( $\kappa$ ) parts of the complex refractive index, and absorption coefficient  $\alpha$  of strained  $\text{Sc}_2\text{CO}_2$  monolayers as a function of photon energy.

## Sc<sub>2</sub>C(OH)<sub>2</sub>

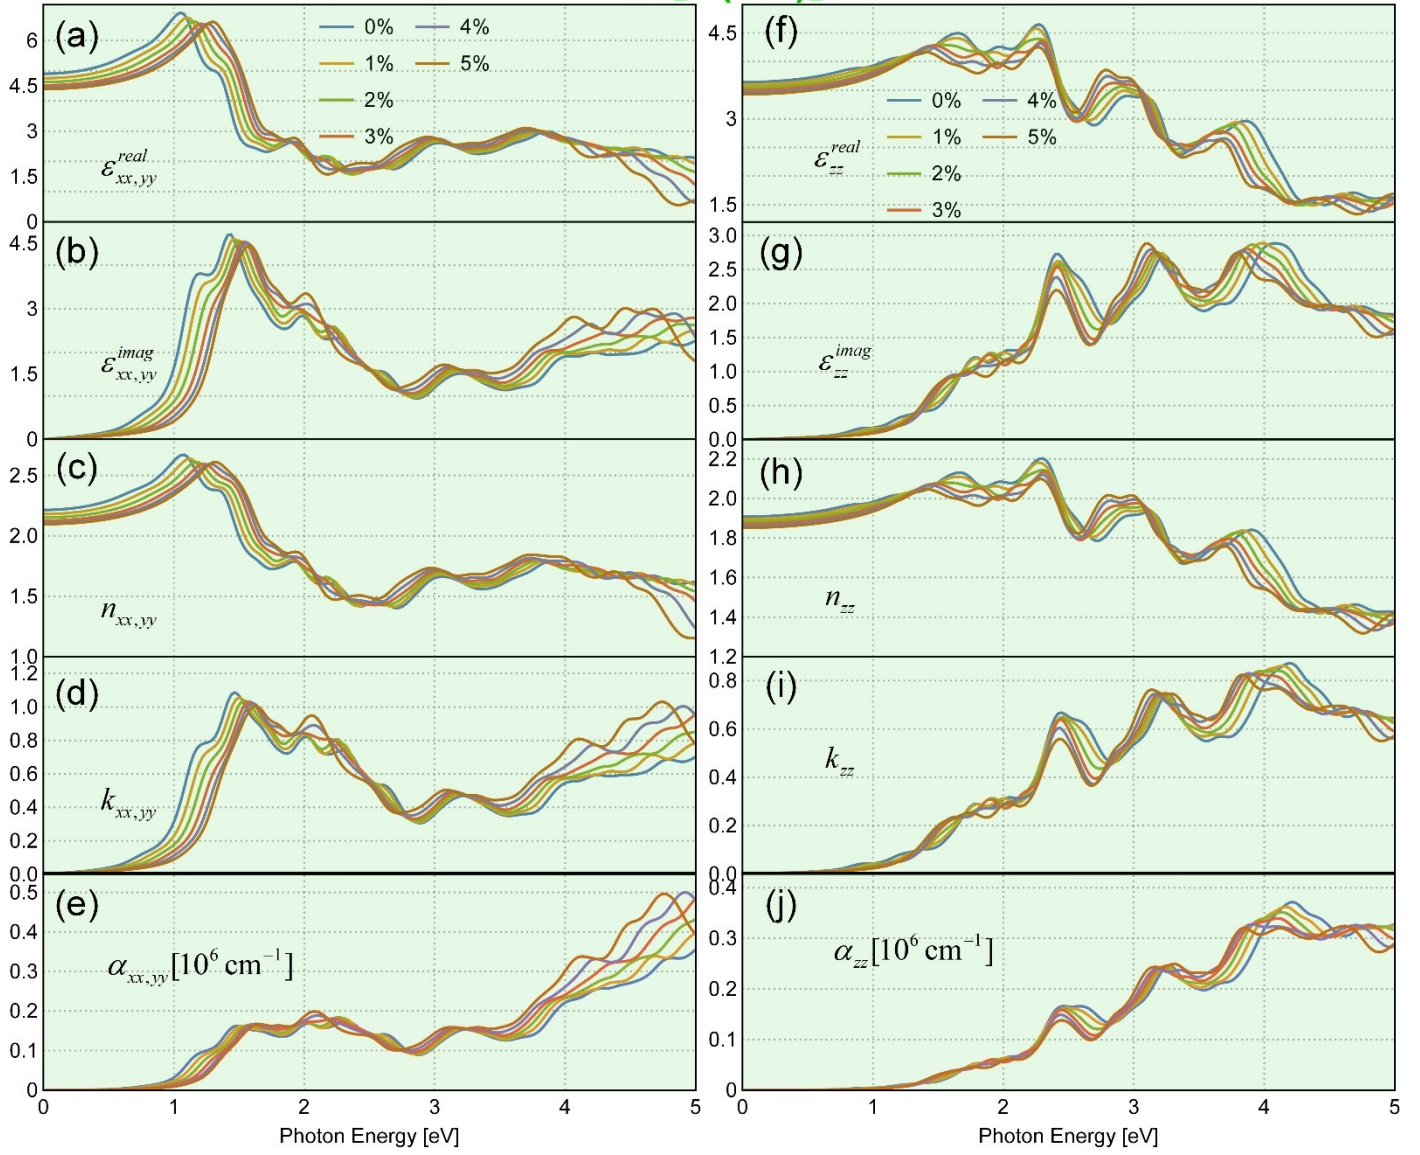

Figure S4. (a)~(f) In-plane and (g)~(l) out-of-plane of the linear optical coefficients including real ( $\epsilon^{real}$ ) and imaginary ( $\epsilon^{imag}$ ) parts of the dielectric function, real ( $n$ ) and imaginary ( $\kappa$ ) parts of the complex refractive index, and absorption coefficient  $\alpha$  of strained Sc<sub>2</sub>C(OH)<sub>2</sub> monolayers as a function of photon energy.

### 3. Photoelastic tensor of strained Sc<sub>2</sub>CT<sub>2</sub> (T=O and OH) monolayers

The second-order nonlinear susceptibility  $\chi^{abc}(-2\omega, \omega, \omega)$  corresponding formalism was derived in a simpler manner by Aversa and Sipe, and was rearranged by Rashkeev *et al* [5-7]. The second-order nonlinear susceptibility  $\chi^{abc}(-2\omega, \omega, \omega)$ , which consists of the contribution from the pure interband processes  $\chi_e^{abc}(-2\omega, \omega, \omega)$ , and the mixed interband and intraband processes  $\chi_i^{abc}(-2\omega, \omega, \omega)$  can be described as:

$$\chi^{abc}(-2\omega, \omega, \omega) = \chi_e^{abc}(-2\omega, \omega, \omega) + \chi_i^{abc}(-2\omega, \omega, \omega) \quad (\text{S3})$$

The contribution from these two processes could be obtained by:

$$\chi_e^{abc}(-2\omega, \omega, \omega) = \frac{e^3}{\hbar^2 \Omega} \sum_{nml,k} \frac{1}{2} \frac{r_{nm}^a (r_{ml}^b r_{ln}^c + r_{ml}^c r_{ln}^b)}{(\omega_{ln} - \omega_{ml})} \left[ \frac{2f_{nm}}{\omega_{mn} - 2\omega} + \frac{f_{ln}}{\omega_{ln} - \omega} + \frac{f_{ml}}{\omega_{ml} - \omega} \right] \quad (\text{S4})$$

$$\begin{aligned} \chi_i^{abc}(-2\omega, \omega, \omega) &= \frac{i}{2} \frac{e^3}{\hbar^2 \Omega} \sum_{nm,k} f_{nm} \left[ \frac{2}{\omega_{mn}(\omega_{mn} - 2\omega)} r_{nm}^a (r_{nm;c}^b + r_{mn;b}^c) \right] \\ &+ \frac{1}{\omega_{mn}(\omega_{mn} - \omega)} (r_{nm;c}^a r_{mn}^b + r_{nm;b}^a r_{mn}^c) \\ &+ \frac{1}{\omega_{mn}^2} \left( \frac{1}{\omega_{mn} - \omega} - \frac{4}{\omega_{mn} - 2\omega} \right) r_{nm}^a (r_{mn}^b \Delta_{mn}^c + r_{mn}^c \Delta_{mn}^b) \\ &- \frac{1}{2\omega_{mn}(\omega_{mn} - \omega)} (r_{nm;a}^b r_{mn}^c + r_{nm;a}^c r_{mn}^b) \end{aligned} \quad (\text{S5})$$

Where  $r$  is the position operator;  $\Omega$  is the unit cell volume; superscripts a, b and c are Cartesian components;  $\hbar\omega_{mn} = \hbar\omega_m - \hbar\omega_n$ , is the energy difference for the bands m and n;  $r_{mn;a}^b$  is the generalized derivative of the coordinate operator.

$$r_{mn;a}^b = \frac{r_{nm}^a \Delta_{mn}^b + r_{nm}^b \Delta_{mn}^a}{\omega_{nm}} + \frac{i}{\omega_{nm}} \sum_l (\omega_{lm} r_{nl}^a r_{lm}^b - \omega_{nl} r_{nl}^b r_{lm}^a) \quad (\text{S6})$$

Where  $\Delta_{mn}^a = (p_{nm}^a - p_{mn}^a) / m$  is the difference between the electronic velocities at the bands n and m;  $p$  is the momentum matrix element. At the zero-frequency limit, the **Equation (S5)** can be simplified as[5, 7]:

$$\chi_e^{abc} = \frac{e^3}{\hbar^2 \Omega} \sum_{nml,k} \frac{r_{nm}^a (r_{ml}^b r_{ln}^c + r_{ml}^c r_{ln}^b)}{(\omega_{ln} - \omega_{ml})} [\omega_n f_{ml} + \omega_m f_{ln} + \omega_l f_{mn}] \quad (\text{S7})$$

$$\chi_i^{abc} = \frac{i}{4} \frac{e^3}{\hbar^2 \Omega} \sum_{nm,k} \frac{f_{nm}}{\omega_{mn}^2} \left[ r_{nm}^a (r_{mn;c}^b + r_{mn;b}^c) + r_{nm}^b (r_{mn;c}^a + r_{mn;a}^c) + r_{nm}^c (r_{mn;b}^a + r_{mn;a}^b) \right] \quad (\text{S8})$$

To simplify the rank of tensors, the second order nonlinear susceptibility  $\chi_{ijk}^{(2)}$  is related to the second-order nonlinear coefficient  $d_{ul}$  as  $\chi_{ijk}^{(2)}(\omega, \omega) = 2d_{ul}(\omega, \omega)$ .

According to the relationship between the second-order nonlinear coefficient  $d_{ul}^{(2,m\%)}$  and the strain  $m\%$  [8, 9], the photoelastic tensor  $p_{ul}^{m\%}$  can be obtained through the Equation (S9).

$$p_{ul}^{m\%} = \frac{d_{ul}^{(2,m\%)} - d_{ul}^{(2,0)}}{m\%} \quad (\text{S9})$$

Where  $d_{ul}^{(2,0)}$  is the second-order nonlinear coefficient of the unstrained  $\text{Sc}_2\text{CT}_2$  (T=O and OH) monolayers.

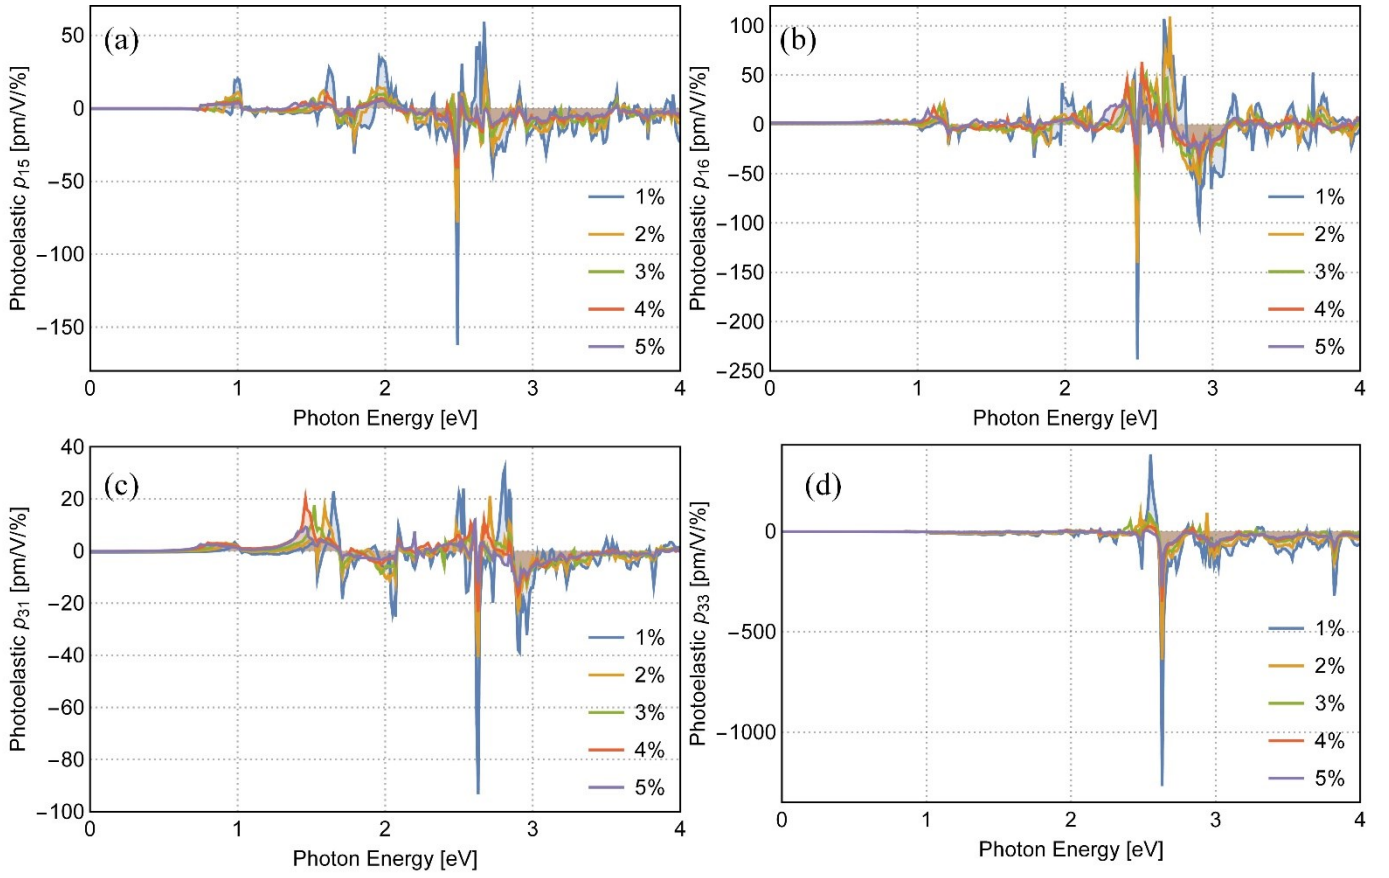

Figure S5 Photon energy-dependent photoelastic tensor elements  $p_{ul}$  of (a-d) monolayer  $\text{Sc}_2\text{CO}_2$  at different tensile strained states.



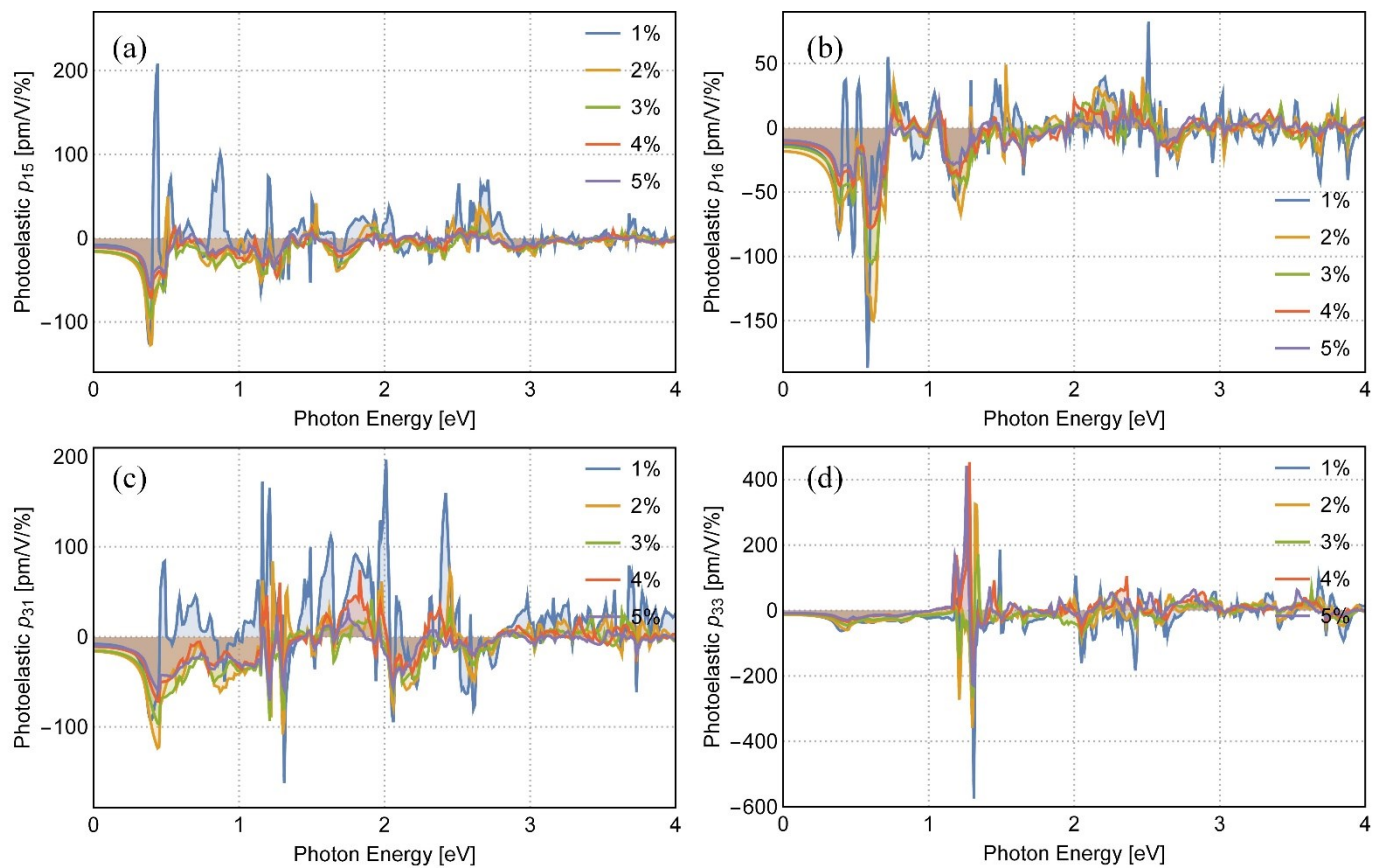

Figure S6 Photon energy-dependent photoelastic tensor elements  $p_{\mu l}$  of (a-d) monolayer  $\text{Sc}_2\text{C}(\text{OH})_2$  at different tensile strained states.

#### 4. Second harmonic generation in strained $\text{Sc}_2\text{CT}_2$ (T=O and OH) monolayers

The schematic setup for the second harmonic generation (SHG) in a reflection configuration is shown in

**Figure S7.** The incident pump light is linearly polarized along the  $X$  direction with an incident angle  $\theta$  to the sample surface. The electric field of the incident light can be given as:

$$\begin{bmatrix} E_X \\ E_Y \\ E_Z \end{bmatrix} = \begin{bmatrix} E_0 \cos[\theta] \\ 0 \\ E_0 \sin[\theta] \end{bmatrix} \quad (\text{S10})$$

The second order nonlinear susceptibility  $\chi_{ijk}^{(2)}$  is related to the second-order nonlinear coefficient  $d_{\mu l}$  as:

$$d_{\mu l} = \frac{1}{2} \chi_{ijk}^{(2)} = \begin{bmatrix} d_{11} & d_{12} & d_{13} & d_{14} & d_{15} & d_{16} \\ d_{21} & d_{22} & d_{23} & d_{24} & d_{25} & d_{26} \\ d_{31} & d_{32} & d_{33} & d_{34} & d_{35} & d_{36} \end{bmatrix} \quad (\text{S11})$$

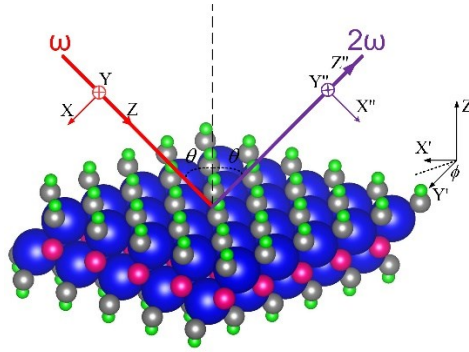

**Figure S7** Schematic of SHG in a reflection configuration.  $XYZ$  and  $X'Y'Z'$  represent the laboratory and crystal coordination, respectively.

The transformation tensor containing azimuthal angle could be obtained by a rotating operation  $T(\phi)$ .

$$d_{i,j,k}^{(2)'} = \sum_{f=1}^3 T_{i,f} \times \sum_{g=1}^3 T_{j,g} \times \sum_{h=1}^3 T_{k,h} \times d_{f,g,h}^{(2)} \quad (\text{S12})$$

$$T(\phi) = \begin{bmatrix} \text{Cos}[\phi] & \text{Sin}[\phi] & 0 \\ -\text{Sin}[\phi] & \text{Cos}[\phi] & 0 \\ 0 & 0 & 1 \end{bmatrix} \quad (\text{S13})$$

Here  $\phi$  denotes the angle between the mirror plane in the crystal structure and the polarization of the pump beam;  $T_{i,f}$ ,  $T_{j,g}$  and  $T_{k,h}$  is an element in  $T(\phi)$ . Thus, the SHG components can be expressed as:

$$\begin{bmatrix} P_x(2\omega) \\ P_y(2\omega) \\ P_z(2\omega) \end{bmatrix} = 2\varepsilon_0 d_{\mu l}'(\phi) \begin{bmatrix} E_x^2(\omega, \theta) \\ E_y^2(\omega, \theta) \\ E_z^2(\omega, \theta) \\ 2E_y(\omega, \theta)E_z(\omega, \theta) \\ 2E_z(\omega, \theta)E_x(\omega, \theta) \\ 2E_x(\omega, \theta)E_y(\omega, \theta) \end{bmatrix} \quad (\text{S14})$$

where  $\varepsilon_0$  is the permittivity of the space. Thus, the dependence of the two polarization components (parallel and perpendicular) of SHG on sample orientation could be described as:

$$\begin{aligned} I_{//} &\propto [-P_x(d_{\mu l}, \phi) \cos[\theta] + P_z(d_{\mu l}, \phi) \sin[\theta]]^2 \\ I_{\perp} &\propto P_y^2(d_{\mu l}, \phi) \end{aligned} \quad (\text{S15})$$

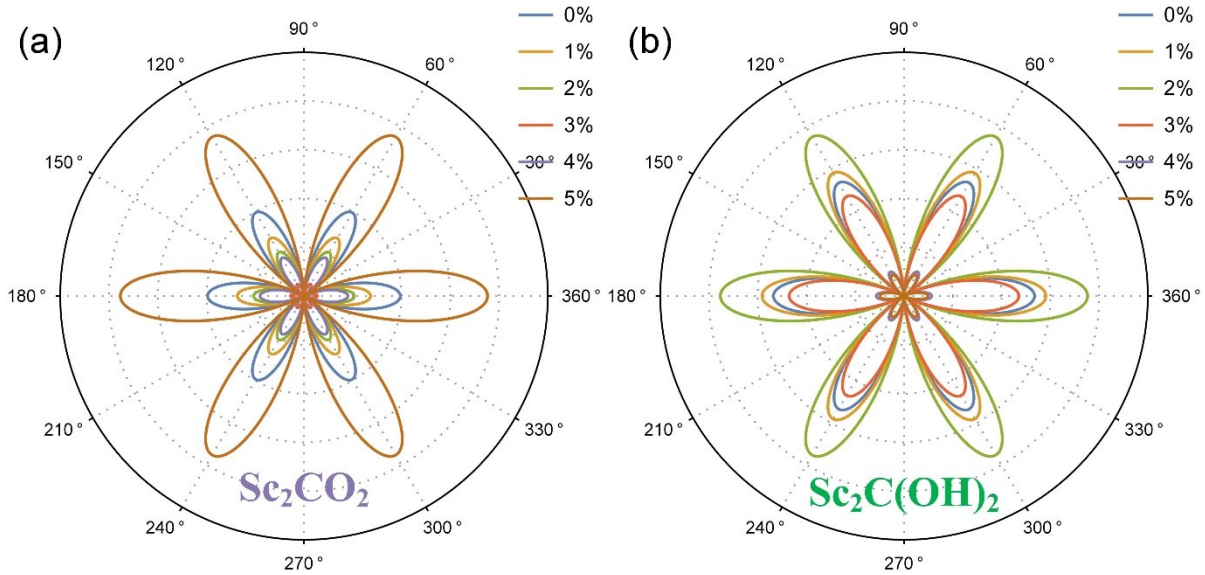

Figure S8. Perpendicular component of the SHG intensity under different tensile strained states for (a)  $\text{Sc}_2\text{CO}_2$  monolayers and (b)  $\text{Sc}_2\text{C}(\text{OH})_2$  monolayers.

#### References:

- [1] G. Kresse, J. Furthmüller, Efficiency of ab-initio total energy calculations for metals and semiconductors using a plane-wave basis set, *Computational Materials Science*, 6 (1996) 15-50.
- [2] G. Kresse, J. Furthmüller, Efficient iterative schemes for ab initio total-energy calculations using a plane-wave basis set, *Phys. Rev. B*, 54 (1996) 11169-11186.
- [3] J.P. Perdew, K. Burke, M. Ernzerhof, Generalized Gradient Approximation Made Simple, *Phys. Rev. Lett.*, 77 (1996) 3865-3868.
- [4] Y. Lee, S.B. Cho, Y.-C. Chung, Tunable Indirect to Direct Band Gap Transition of Monolayer  $\text{Sc}_2\text{CO}_2$  by the Strain Effect, *ACS Appl. Mater. Interfaces*, 6 (2014) 14724-14728.
- [5] Z. Fang, J. Lin, R. Liu, P. Liu, Y. Li, X. Huang, K. Ding, L. Ning, Y. Zhang, Computational Design of the Inorganic Nonlinear Optical Crystals Based on the Genetic Algorithm, *CrystEngComm*, 16 (2014) 10569-10580.
- [6] C. Aversa, J.E. Sipe, Nonlinear optical susceptibilities of semiconductors: Results with a length-gauge analysis, *Physical*

Review B Condensed Matter, 52 (1995) 14636-14645.

[7] S.N. Rashkeev, W.R.L. Lambrecht, B. Segall, Efficient ab-initio method for the calculation of frequency dependent non-linear optical response in semiconductors: application to second harmonic generation, Phys. Rev. B: Condens. Matter Mater. Phys. 1998, 57 (7),3905–3919.

[8] L. Mennel, M.M. Furchi, S. Wachter, M. Paur, D.K. Polyushkin, T. Mueller, Optical imaging of strain in two-dimensional crystals, Nat. Commun., 9 (2018) 516.

[9] L. Mennel, M. Paur, T. Mueller, Second harmonic generation in strained transition metal dichalcogenide monolayers: MoS<sub>2</sub>, MoSe<sub>2</sub>, WS<sub>2</sub>, and WSe<sub>2</sub>, APL Photonics, 4 (2018) 034404.
